# Supplementary material for: Rat Cytomegalovirus Vaccine Prevents Accelerated Chronic Rejection in CMV‐Naïve Recipients of Infected Donor Allograft Hearts
Source: PubMed Central journal article supplement — Am J Transplant. 2015 Mar 12;15(7):1805–16. doi: 10.1111/ajt.13188 (PMC5006870; doi:10.1111/ajt.13188), 2015-03-12
Supplement: AJT-15-1805-s001.pdf [file AJT-15-1805-s001.pdf]

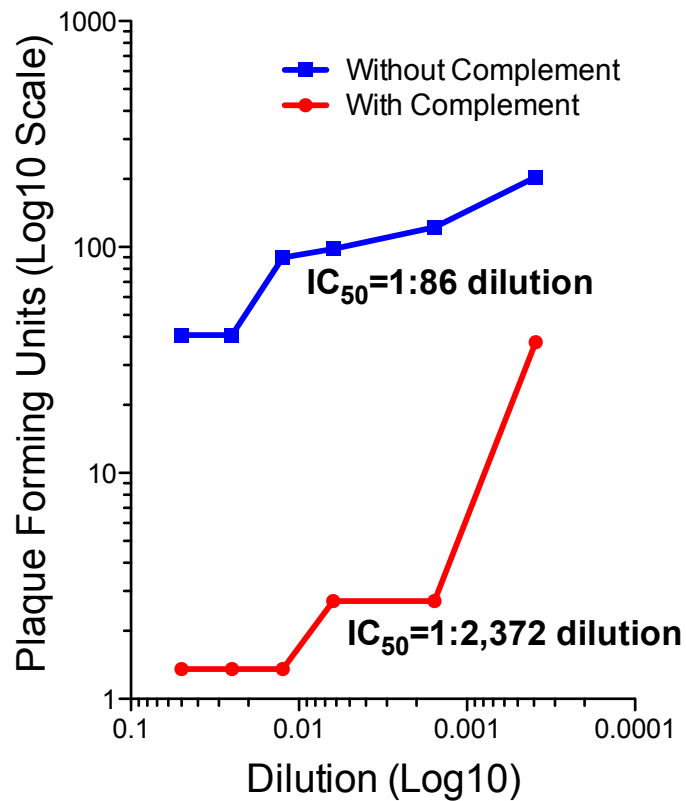

**Supplemental Figure 1. Neutralization potential of Anti-RCMV gB-specific rat monoclonal antibody is higher in the presence of complement.** Plaque reduction neutralizing assays were performed on anti-RCMV gB monoclonal rat antibody (isotype is rat IgG2b) in the presence or absence of complement. Antibody +/- complement was added to 100 pfu of RCMV for 1 hr at 37°C and then added to rat fibroblasts for plaque assay. Data is presented as plaque forming units. Lower numbers indicate neutralizing antibody was present. The generation of neutralizing antibody correlates with protection from RCMV graft infection and accelerated rejection.
