# Supplementary material for: Rat Cytomegalovirus Vaccine Prevents Accelerated Chronic Rejection in CMV‐Naïve Recipients of Infected Donor Allograft Hearts
Source: PubMed Central journal article supplement — Am J Transplant. 2015 Mar 12;15(7):1805–16. doi: 10.1111/ajt.13188 (PMC5006870; doi:10.1111/ajt.13188), 2015-03-12
Supplement: AJT-15-1805-s002.pdf [file AJT-15-1805-s002.pdf]

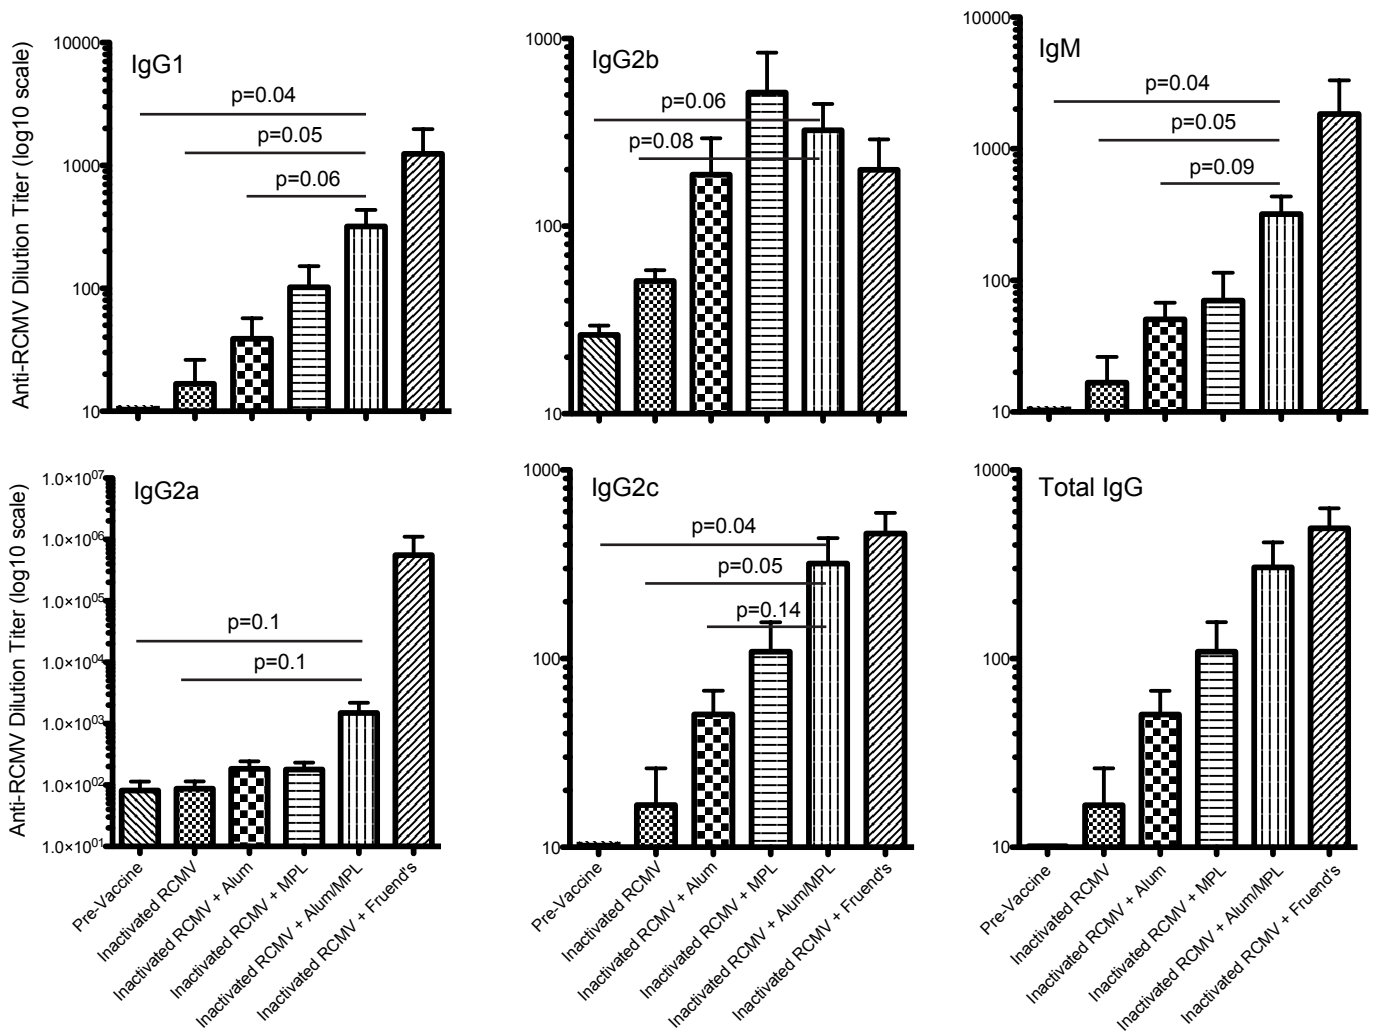

**Supplemental Figure 2. Analysis of Anti-RCMV serum antibody isotype by ELISA for vaccinated rats.**

The production of anti-RCMV antibodies in the sera from vaccinated animals was compared to control pre-vaccine sera. RCMV-specific endpoint antibody titers were measured using standard ELISA detecting RCMV-infected cell lysates as the antigenic source. Primary antibody binding was detected using anti-rat isotype-specific secondary antibodies (IgG and IgM) as well as IgG Subclass (IgG1, IgG2a, IgG2b and IgG2c). Animals vaccinated against inactivated RCMV using Alum + MPL and those with Freund's adjuvant were significantly higher for total IgG, IgG1, IgM, IgG2c compared to animals vaccinated with inactivated RCMV alone or in combination with Alum. N=6 per group.
